# Supplementary material for: Genomic Analysis of the Necrotrophic Fungal Pathogens Sclerotinia sclerotiorum and Botrytis cinerea
Source: PLOS journal article supplement (doi:10.1371/journal.pgen.1002230), 2011-08-18

**Figure S4****Gene length distribution before and after filtering of dubious gene predictions.**

Histogram of gene length for *B. cinerea* (Bc) B05.10 and T4 initial and filtered (high confidence) genes, *S. sclerotiorum* (Ss) initial and filtered (high confidence) genes, *Neurospora crassa* (Nc) genes, and *Gibberella zeae* (Gz) genes.

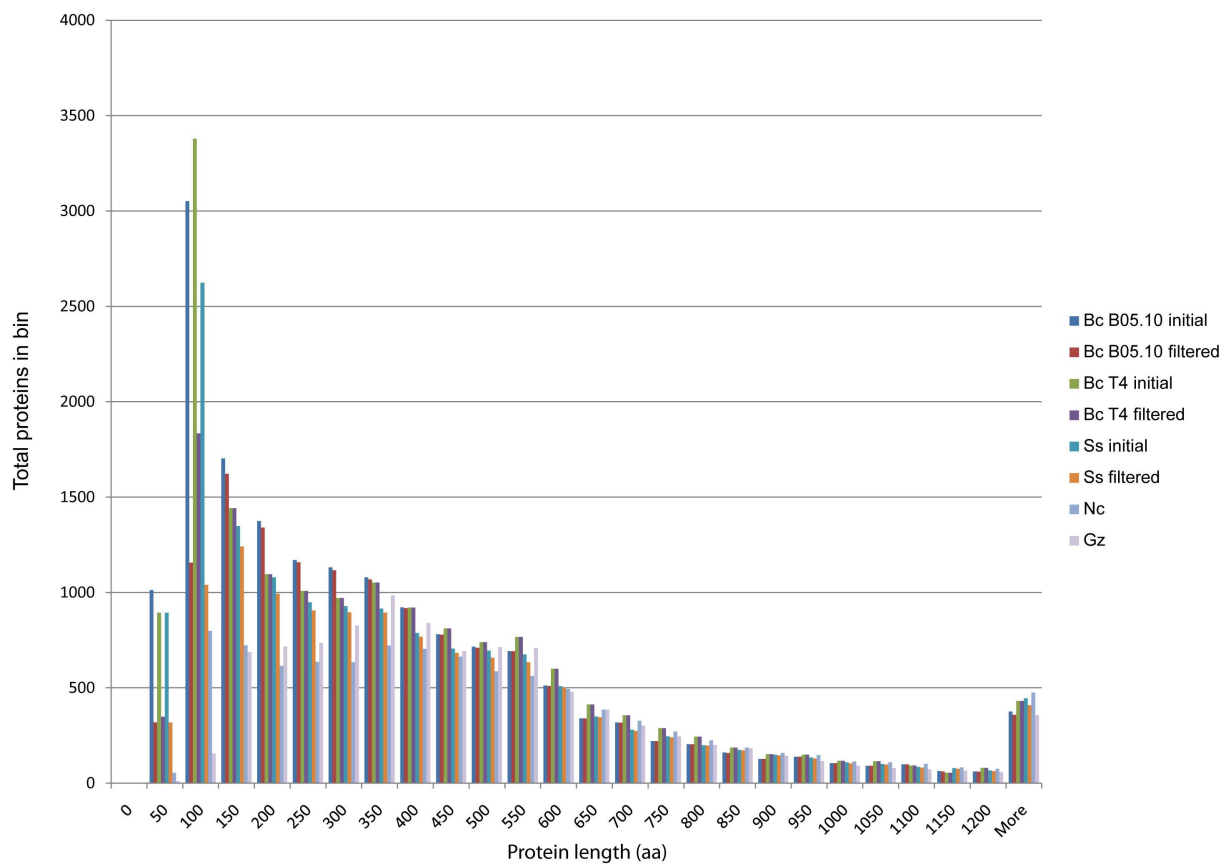

Supplement: S4 (10.1371/journal.pgen.1002230.s004) [file journal.pgen.1002230.s004]
