# Supplementary material for: Genomic Analysis of the Necrotrophic Fungal Pathogens Sclerotinia sclerotiorum and Botrytis cinerea
Source: PLOS journal article supplement (doi:10.1371/journal.pgen.1002230), 2011-08-18

Figure S8

Phylogeny of apoptosis-associated BIR1-homologs in fungi and yeasts.

Dark gray boxes indicate homologs with two BIR-domains in a single protein, light gray boxes indicate homologs with one BIR-domain in a single protein, white boxes indicate homologs lacking a BIR-domain.

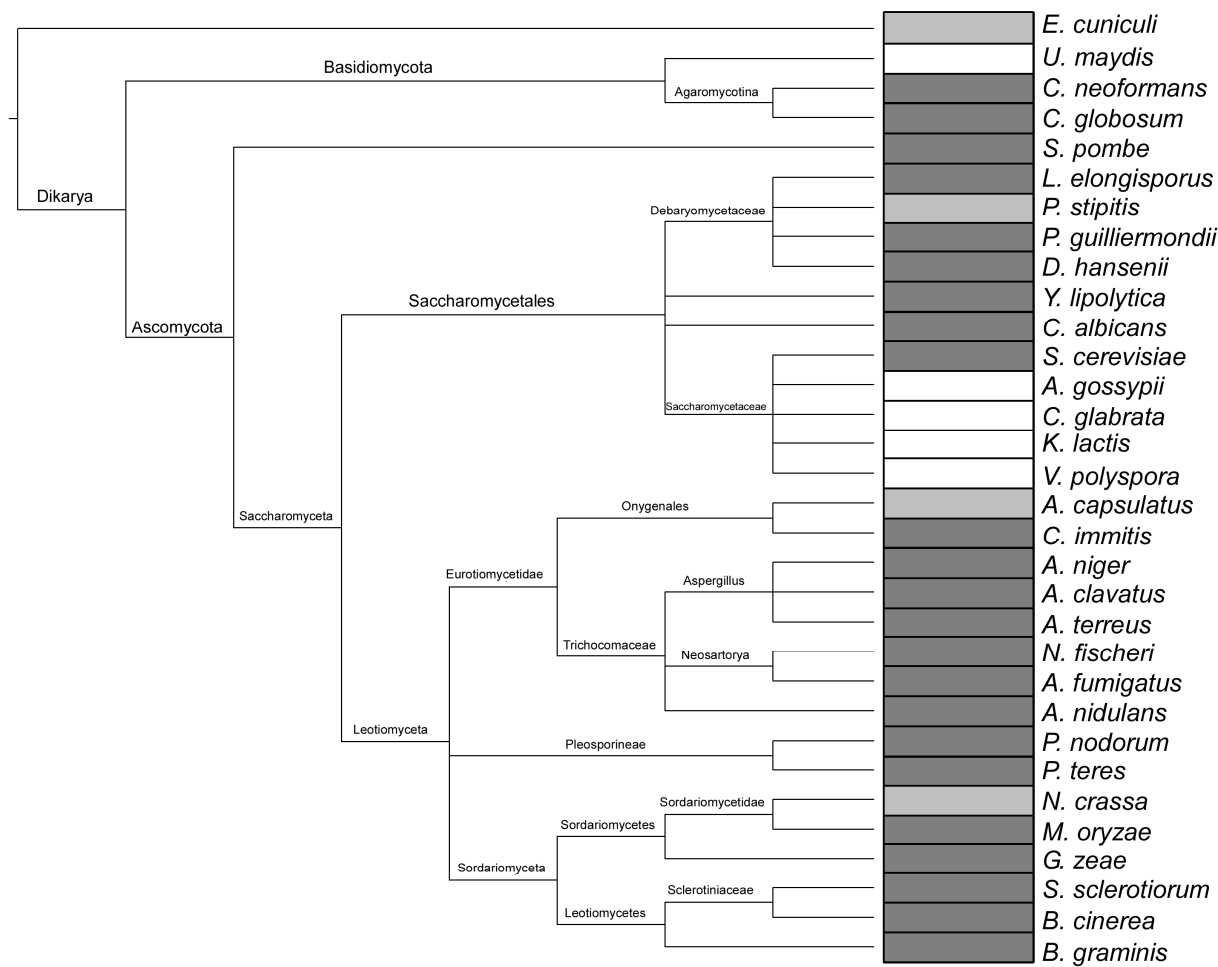

Supplement: S8 (10.1371/journal.pgen.1002230.s008) [file journal.pgen.1002230.s008]
