# Supplementary material for: Genomic Analysis of the Necrotrophic Fungal Pathogens Sclerotinia sclerotiorum and Botrytis cinerea
Source: PLOS journal article supplement (doi:10.1371/journal.pgen.1002230), 2011-08-18
Supplement: S14 (10.1371/journal.pgen.1002230.s014) [file journal.pgen.1002230.s014]

**Table S3****Duplicated blocks within the genome of *S. sclerotiorum* and *B. cinerea* strain B05.10.**

*B.cinerea* strain T4 lacks duplicated blocks. Blocks were identified using DAGchainer, using similar pairs identified by Blastp as input, and selecting regions of at least 4 genes. Regions may contain unaligned pairs; gene ranges are not necessarily inclusive.

| Region 1 genes        | Region 2 genes        | Region 1 (bp) | Region 2 (bp) | Aligned pairs | Annotation                                                   |
|-----------------------|-----------------------|---------------|---------------|---------------|--------------------------------------------------------------|
| SS1G_05623-SS1G_05627 | SS1G_11509-SS1G_11512 | 8,994         | 13,258        | 4             | predicted proteins; HET-E-1; kinesin light chain 1 (Het); RT |
| SS1G_06637-SS1G_06640 | SS1G_07150-SS1G_07154 | 10,872        | 8,668         | 4             | predicted proteins; HET-E-1                                  |
| SS1G_07990-SS1G_07998 | SS1G_05532-SS1G_05538 | 11,741        | 11,269        | 6             | predicted proteins; HET-E-1                                  |
| SS1G_10115-SS1G_10120 | SS1G_02418-SS1G_02423 | 12,435        | 14,219        | 4             | predicted proteins; HET-E-1; RT                              |
| SS1G_08056-SS1G_08069 | SS1G_11513-SS1G_11527 | 25,897        | 25,920        | 12            | predicted proteins                                           |
| SS1G_08022-SS1G_08026 | SS1G_02835-SS1G_02831 | 8,437         | 11,233        | 5             | predicted proteins; ATP-dependent chaperone                  |
| SS1G_09355-SS1G_09358 | SS1G_12423-SS1G_12420 | 5,667         | 5,759         | 4             | predicted proteins; serine/threonine protein kinase          |
| SS1G_14499-SS1G_14505 | SS1G_14508-SS1G_14514 | 14,606        | 17,146        | 6             | rDNA region; spurious genes                                  |
| BC1G_13988-BC1G_14000 | BC1G_09697-BC1G_09713 | 44,806        | 38,400        | 8             | predicted proteins                                           |
| BC1G_02169-BC1G_02172 | BC1G_12335-BC1G_12338 | 10,514        | 10,110        | 4             | predicted proteins                                           |
