# Supplementary material for: Genomic Analysis of the Necrotrophic Fungal Pathogens Sclerotinia sclerotiorum and Botrytis cinerea
Source: PLOS journal article supplement (doi:10.1371/journal.pgen.1002230), 2011-08-18
Supplement: S25 (10.1371/journal.pgen.1002230.s025) [file redirect.do]

**Table S14*****S. sclerotiorum* and *B. cinerea* orthologs of *Aspergillus nidulans* genes involved in mating and fruiting body development.**

| <i>S.sclerotiorum</i> | <i>B. cinerea</i> B05.10      | <i>B. cinerea</i> T4 | <i>A. nidulans</i>                           | Function                                                                                              | Role                      |
|-----------------------|-------------------------------|----------------------|----------------------------------------------|-------------------------------------------------------------------------------------------------------|---------------------------|
| SS1G_01435.1          | BC1G_07957.1                  | BofuT4_P122140.1     | AN1539 ( <i>csnD</i> )                       | Signalosome subunit 4, regulation of sexual development                                               | Fruiting Body Development |
| SS1G_03348.1          | BC1G_09577.1                  | BofuT4_P130860.1     | AN2129 ( <i>csnE</i> )                       | Signalosome subunit 5, regulation of sexual development                                               | Fruiting Body Development |
| SS1G_01477.1          | BC1G_05510.1                  | BofuT4_P106710.1     | AN8211                                       | <i>U. maydis rum1</i> , repressor of b mating type regulated genes                                    | Fruiting Body Development |
| SS1G_05588.1          | Not found                     | BofuT4_P114070.1     | AN8676                                       | <i>U. maydis umc1</i> , MADS-box TF, modulator of pheromone-inducible gene expression                 | Fruiting Body Development |
| SS1G_09861.1          | BC1G_02738.1                  | BofuT4_P118690.1     | AN7349 ( <i>mutA</i> )                       | Mutanase, cell wall turnover during sexual development                                                | Fruiting Body Development |
| SS1G_13426.1          | BC1G_06397.1                  | BofuT4_P062810.1     | AN0135                                       | <i>P. anserina cro1</i> , regulator of myosin function; required for syncytial to cellular transition | Fruiting Body Development |
| SS1G_02971.1          | BC1G_02217.1-<br>BC1G_02218.1 | BofuT4_P142510.1     | AN2094                                       | Nc_DopA; NCU09219.2; cellular morphogenesis regulator                                                 | Fruiting Body Development |
| SS1G_07526.1          | BC1G_05076.1                  | BofuT4_P129990.1     | AN2330 ( <i>lsdA</i> )                       | Late sexual development                                                                               | Fruiting Body Development |
| SS1G_01657.1          | BC1G_14780.1                  | Not found            | AN1967 ( <i>ppoA</i> )                       | Fatty acid oxygenase, sexual-aseexual development balance                                             | Fruiting Body Development |
| SS1G_10705.1          | BC1G_04254.1                  | BofuT4_P094090.1     | AN1967 ( <i>ppoA</i> )                       | Fatty acid oxygenase, sexual-aseexual development balance                                             | Fruiting Body Development |
| SS1G_08963.1          | BC1G_12309.1                  | BofuT4_P151640.1     | AN6505                                       | rcoA; WD domain, G-beta repeat; <i>Aspergillus</i> homolog maybe downstream of veA                    | Fruiting Body Development |
| SS1G_10366.1          | BC1G_10441.1                  | BofuT4_P093440.1     | AN3152 ( <i>nsdD</i> )                       | GATA-transcription factor                                                                             | Fruiting Body Development |
| SS1G_12699.1          | BC1G_05192.1                  | BofuT4_P101330.1     | AN1848&AN5170 ( <i>prot1</i> & <i>rosA</i> ) | Cys6-Zn2 transcriptional activator                                                                    | Fruiting Body Development |
| SS1G_00169.1          | BC1G_06118.1                  | BofuT4_P017330.1     | AN2002                                       | Sc_RAM1/STE16; CAAX-farnesyl-transferase $\beta$ subunit; a-factor modification                       | Mating Process            |
| SS1G_00428.1          | BC1G_00681.1                  | Not found            | AN6528                                       | Sc_RCE1; CAAX prenyl protease a-factor C-terminal processing                                          | Mating Process            |

|              |              |                              |                        |                                                                                                     |                           |
|--------------|--------------|------------------------------|------------------------|-----------------------------------------------------------------------------------------------------|---------------------------|
| SS1G_04003.1 | BC1G_15147.1 | Not found                    | No ortholog            | Mating-type locus associated gene of unknown function                                               | Mating Process            |
| SS1G_04004.1 | BC1G_15148.1 | BofuT4_P160330.1 (truncated) | AN2755 ( <i>matB</i> ) | Mating-type ( $\alpha$ -box domain transcriptional activator)                                       | Mating Process            |
| SS1G_04006.1 | Not found    | BofuT4_P160320.1             | AN4734 ( <i>matA</i> ) | Mating-type (HMG: high mobility group transcriptional activator)                                    | Mating Process            |
| SS1G_04584.1 | BC1G_00012.1 | BofuT4_P050100.1             | AN2885                 | HMG (high mobility group) box, SAM domain (Sterile $\alpha$ motif); Non-mating type associated HMG. | Uncharacterized           |
| SS1G_05340.1 | BC1G_07079.1 | BofuT4_P054270.1             | AN1962                 | HMG (high mobility group) box                                                                       | Fruiting Body Development |
| SS1G_06027.1 | BC1G_01499.1 | BofuT4_P041860.1             | AN3583 ( <i>kexB</i> ) | Endoprotease for $\alpha$ -factor processing                                                        | Mating Process            |
| SS1G_06080.1 | BC1G_01430.1 | BofuT4_P041150.1             | AN3867                 | Sc_RAM2; CAAX-farnesyl transferase $\alpha$ subunit                                                 | Mating Process            |
| SS1G_07287.1 | BC1G_15198.1 | BofuT4_P129120.1             | AN2300 ( <i>atrD</i> ) | Sc_STE6; ATP-dependent efflux pump for $\alpha$ -factor pheromone                                   | Mating Process            |
| SS1G_07744.1 | BC1G_13641.1 | BofuT4_P006030.1             | AN2946                 | Sc_STE13; dipeptidyl amino peptidase $\alpha$ -factor processing                                    | Mating Process            |
| SS1G_04155.1 | BC1G_00201.1 | BofuT4_P048160.1             | No ortholog            | <i>N. crassa ccg-4</i> NCU02500.2 clock-controlled pheromone precursor                              | Mating Process            |
| SS1G_06124.1 | BC1G_01388.1 | BofuT4_P040740.1             | AN2984                 | SRF-type transcription factor (DNA-binding and dimerisation domain); (MADS Box)                     | Mating Process            |
| SS1G_00606.1 | BC1G_06557.1 | BofuT4_P052210.1             | AN2269 ( <i>steC</i> ) | Sc_STE11; Serine/threonine protein kinase MKKK                                                      | Mating Signalling         |
| SS1G_03482.1 | BC1G_07009.1 | BofuT4_P043580.1             | AN0081 ( <i>sfaD</i> ) | Sc_STE 4; G protein $\beta$ -subunit                                                                | Mating Signalling         |
| SS1G_07136.1 | BC1G_10211.1 | BofuT4_P086790.1             | AN2290 ( <i>steA</i> ) | Sc_Ste12; Transcriptional Activator. Homeodomain DNA binding                                        | Mating Signalling         |
| SS1G_07464.1 | BC1G_07387.1 | BofuT4_P103670.1             | AN7743 ( <i>preA</i> ) | Sc_STE 3; Pheromone Receptor (for $\alpha$ -factor like pheromone)                                  | Mating Signalling         |
| SS1G_10310.1 | BC1G_13582.1 | BofuT4_P092750.1             | AN2520 ( <i>preB</i> ) | Sc_STE 2; Pheromone Receptor (for $\alpha$ -factor like pheromone)                                  | Mating Signalling         |
| SS1G_11866.1 | BC1G_13966.1 | BofuT4_P067340.1             | AN3719 ( <i>mpkB</i> ) | Sc_FUS3; MAP kinase                                                                                 | Mating Signalling         |
| SS1G_12343.1 | BC1G_01681.1 | BofuT4_P134310.1             | AN0651 ( <i>fadA</i> ) | Sc_GPA1; G protein $\alpha$ -subunit                                                                | Mating Signalling         |
