# Supplementary material for: Genomic Analysis of the Necrotrophic Fungal Pathogens Sclerotinia sclerotiorum and Botrytis cinerea
Source: PLOS journal article supplement (doi:10.1371/journal.pgen.1002230), 2011-08-18
Supplement: S28 (10.1371/journal.pgen.1002230.s028) [file redirect.do]

**Table S17*****S. sclerotiorum* and *B. cinerea* orthologs of appressorium-associated genes in *Magnaporthe oryzae*.**

| <i>S. sclerotiorum</i>      | <i>B. cinerea</i> B05.10    | <i>B. cinerea</i> T4                | <i>M. oryzae</i>                                            | Function                                                                           |
|-----------------------------|-----------------------------|-------------------------------------|-------------------------------------------------------------|------------------------------------------------------------------------------------|
| SS1G_05586.1                | BC1G_09439.1                | BofuT4_P114010.1                    | <i>pls1</i> (MGG_12594.6)                                   | appressorium penetration; tetraspanin                                              |
| No ortholog                 | No ortholog                 | No ortholog                         | <i>mpg1</i> (MGG_10315.6)                                   | adhesion; hydrophobin                                                              |
| No ortholog                 | No ortholog                 | No ortholog                         | <i>pth11</i> (MGG_05871.6)                                  | appressorium differentiation; integral membrane protein                            |
| SS1G_11636.1 & SS1G_11637.1 | BC1G_10952.1                | BofuT4_P155910.1                    | <i>pde1</i> (MGG_00111.6)                                   | no penetration hyphae; aminophospholipid translocase (APT) family of P-type ATPase |
| SS1G_01851.1                | BC1G_02517.1                | BofuT4_P109590.1                    | <i>emp1</i> (MGG_00527.6)                                   | appressorium formation; extracellular matrix protein                               |
| SS1G_01602.1                | BC1G_02467.1                | BofuT4_P110100.1                    | <i>atg8</i> (MGG_01062.6)                                   | penetration hyphae; autophagy                                                      |
| SS1G_13339.1                | BC1G_14516.1                | BofuT4_P076990.1                    | <i>pth2</i> (MGG_01721.6)                                   | penetration hyphae; carnitine O-acetyl transferase                                 |
| SS1G_07136.1                | BC1G_10211.1                | BofuT4_P086790.1                    | <i>mst12</i> (MGG_12958.6)                                  | appressorium maturation; <i>steA</i> transcription factor                          |
| SS1G_00637.1                | BC1G_06518.1                | BofuT4_P051820.1                    | <i>chm1</i> (MGG_06320.6)                                   | appressorium formation and penetration; PAK protein kinase                         |
| No ortholog                 | No ortholog                 | No ortholog                         | <i>mas1</i> <sup>#</sup> ( <i>asg1;gas1</i> ) (MGG_12337.6) | appressorium penetration                                                           |
| SS1G_10311.1                | BC1G_13581.1                | No ortholog                         | <i>mas2</i> <sup>#</sup> (MGG_04202.6)                      | appressorium penetration                                                           |
| SS1G_11468.1 & SS1G_04934.1 | BC1G_08931.1 & BC1G_14711.1 | BofuT4_P075230.1 & BofuT4_P017380.1 | <i>mas3</i> <sup>#</sup> (MGG_11595.6)                      | uncharacterized                                                                    |
| SS1G_00173.1                | BC1G_06114.1                | BofuT4_P142900.1                    | <i>mas3</i> <sup>#</sup> (MGG_00703.6)                      | uncharacterized                                                                    |
| No ortholog                 | No ortholog                 | No ortholog                         | <i>cas1</i> (MGG_09875.6)                                   | uncharacterized                                                                    |
| SS1G_14237.1                | BC1G_12619.1                | BofuT4_P142900.1                    | <i>mas</i> -related (MGG_00992.6)                           | uncharacterized                                                                    |
| No ortholog                 | No ortholog                 | No ortholog                         | <i>mas</i> -related (MGG_02253.6)                           | uncharacterized                                                                    |

<sup>#</sup>These genes are all annotated as "*mas3*" in the Broad genome site. The *mas1* and *mas2* designation were taken from Xue et al 2002. Plant Cell 14:2107-2119
