# Supplementary material for: Genomic Analysis of the Necrotrophic Fungal Pathogens Sclerotinia sclerotiorum and Botrytis cinerea
Source: PLOS journal article supplement (doi:10.1371/journal.pgen.1002230), 2011-08-18
Supplement: S32 (10.1371/journal.pgen.1002230.s032) [file journal.pgen.1002230.s032]

**Table S21****Polysaccharide degradation-related genes differentially expressed upon plant infection.**

Expression levels were quantified from microarray hybridization. Comparison was made between RNA isolated from sunflower cotyledons colonized by *B. cinerea* strain T4 and RNA isolated from mycelium of *B. cinerea* strain T4 grown *in vitro*. Only genes that were at least 2-fold statistically increased or decreased in at least one fungus were listed. The different substrate categories are described in Tables S19 and S20.

| CAZy genes overexpressed in both fungi |                                   |                             |                                    |                                               |                                                    |
|----------------------------------------|-----------------------------------|-----------------------------|------------------------------------|-----------------------------------------------|----------------------------------------------------|
| Gene ID<br><i>B.cinerea</i>            | Gene ID<br><i>S. sclerotiorum</i> | CAZy<br>family <sup>a</sup> | Substrate<br>category <sup>b</sup> | Fold change<br>infection<br><i>B. cinerea</i> | Fold change<br>infection<br><i>S. sclerotiorum</i> |
| BofuT4_P047740.1                       | SS1G_04207.1                      | GH28                        | P                                  | 24.4 *                                        | 41.9 *                                             |
| BofuT4_P005990.1                       | SS1G_07749.1                      | GH11                        | H                                  | 14.6                                          | 30.5 *                                             |
| BofuT4_P120850.1                       | SS1G_03618.1                      | GH11                        | H                                  | 6.6 *                                         | 29.4 *                                             |
| BofuT4_P014350.1                       | SS1G_12907.1                      | CE5                         | H                                  | 43.3 *                                        | 25.9 *                                             |
| BofuT4_P102210.1                       | SS1G_11992.1                      | CE12                        | HP                                 | 4.9 *                                         | 25.5 *                                             |
| BofuT4_P118670.1                       | SS1G_09866.1                      | GH5                         | HP <sup>†</sup>                    | 8.9 *                                         | 18.5 *                                             |
| BofuT4_P026900.1                       | SS1G_04551.1                      | CE8                         | P                                  | 5.8                                           | 15.6 *                                             |
| BofuT4_P078070.1                       | SS1G_13255.1                      | GH3                         | C or FCW <sup>†</sup>              | 10.0                                          | 15.2 *                                             |
| BofuT4_P023220.1                       | SS1G_07039.1                      | GH28                        | P                                  | 2.1                                           | 14.8 *                                             |
| BofuT4_P023980.1                       | SS1G_08104.1                      | CE5                         | HP                                 | 7.1                                           | 13.1 *                                             |
| BofuT4_P026710.1                       | SS1G_04541.1                      | GH78                        | P                                  | 4.6 *                                         | 12.3 *                                             |
| BofuT4_P061530.1                       | SS1G_00746.1                      | GH5                         | H <sup>†</sup>                     | 154.2 *                                       | 10.6 *                                             |
| BofuT4_P155280.1                       | SS1G_11585.1                      | GH53                        | HP                                 | 10.9 *                                        | 9.5                                                |
| BofuT4_P029340.1                       | SS1G_02553.1                      | GH28                        | P                                  | 3.8                                           | 9.3 *                                              |
| BofuT4_P114590.1                       | SS1G_03387.1                      | GH5                         | C or H <sup>†</sup>                | 9.4 *                                         | 8.7 *                                              |
| BofuT4_P026920.1                       | SS1G_04552.1                      | GH28                        | P                                  | 2.2                                           | 7.9 *                                              |
| BofuT4_P059250.1                       | SS1G_00892.1                      | GH6                         | C                                  | 60.5 *                                        | 7.5 *                                              |
| BofuT4_P141390.1                       | SS1G_09392.1                      | CBM20                       | E                                  | 15.4 *                                        | 7.0                                                |
| BofuT4_P140330.1                       | SS1G_02760.1                      | CE5                         | H                                  | 66.6 *                                        | 6.6 *                                              |
| BofuT4_P070230.1                       | SS1G_03093.1                      | GH78                        | P                                  | 2.7                                           | 6.6 *                                              |
| BofuT4_P125090.1                       | SS1G_02334.1                      | GH7                         | C                                  | 138.5 *                                       | 6.5 *                                              |
| BofuT4_P030130.1                       | SS1G_02620.1                      | GH79                        |                                    | 2.5                                           | 6.1 *                                              |
| BofuT4_P008190.1                       | SS1G_10842.1                      | GH35                        | H                                  | 4.3 *                                         | 5.2 *                                              |
| BofuT4_P067660.1                       | SS1G_11842.1                      | GH93                        | H                                  | 3.4                                           | 5.0 *                                              |
| BofuT4_P011980.1                       | SS1G_10092.1                      | GH11                        | H                                  | 2.2                                           | 4.7 *                                              |
| BofuT4_P062500.1                       | SS1G_13386.1                      | CE5                         | H                                  | 7.6 *                                         | 4.6 *                                              |
| BC1G_01483.1                           | SS1G_06037.1                      | GH5                         | FCW or H <sup>†</sup>              | 23.7 *                                        | 4.0 *                                              |
| BofuT4_P132770.1                       | SS1G_08208.1                      | GH5                         | H <sup>†</sup>                     | 28.2 *                                        | 4.0 *                                              |
| BofuT4_P035890.1                       | SS1G_01229.1                      | GH55                        | FCW                                | 23.0 *                                        | 3.9                                                |
| BofuT4_P047700.1                       | SS1G_04200.1                      | GH92                        |                                    | 6.9 *                                         | 3.9                                                |
| BofuT4_P038970.1                       | SS1G_02462.1                      | GH54                        | HP                                 | 2.4                                           | 3.6 *                                              |
| BofuT4_P150570.1                       | SS1G_09020.1                      | GH7                         | C                                  | 16.7 *                                        | 3.5                                                |
| BofuT4_P078550.1                       | SS1G_13501.1                      | GH78                        | P                                  | 4.4                                           | 3.3 *                                              |
| BofuT4_P010470.1                       | SS1G_03602.1                      | GH51                        | HP                                 | 2.8                                           | 3.1 *                                              |
| BofuT4_P107060.1                       | SS1G_01493.1                      | GH3                         | HP <sup>†</sup>                    | 3.2                                           | 3.0 *                                              |
| BofuT4_P006540.1                       | SS1G_07863.1                      | CBM1                        | PCW                                | 24.1 *                                        | 2.7                                                |
| BofuT4_P059260.1                       | SS1G_00891.1                      | GH5                         | C                                  | 27.0 *                                        | 2.6                                                |
| BofuT4_P103120.1                       | SS1G_12048.1                      | CE12                        | HP                                 | 8.6 *                                         | 2.6 *                                              |
| BofuT4_P010370.1                       | SS1G_03610.1                      | CE16                        | H                                  | 5.4 *                                         | 2.5                                                |
| BofuT4_P091380.1                       | SS1G_09821.1                      | GH61                        | C                                  | 88.0 *                                        | 2.4                                                |
| BofuT4_P103410.1                       | SS1G_12083.1                      | GH115                       | P                                  | 9.0                                           | 2.4 *                                              |
| BofuT4_P025430.1                       | SS1G_14158.1                      | GH61                        | C                                  | 2.7                                           | 2.3 *                                              |
| BofuT4_P086620.1                       | SS1G_07162.1                      | GH3                         | C or FCW <sup>†</sup>              | 12.0 *                                        | 2.2 *                                              |
| BofuT4_P003870.1                       | SS1G_07656.1                      | GH61                        | C                                  | 19.0 *                                        | 2.2                                                |
| BofuT4_P112910.1                       | SS1G_08837.1                      | GH5                         | C                                  | 57.0 *                                        | 2.2                                                |
| BofuT4_P036980.1                       | SS1G_01572.1                      | GH35                        | H or HP <sup>†</sup>               | 6.0 *                                         | 2.2                                                |
| BofuT4_P143540.1                       | SS1G_14289.1                      | CE16                        | H                                  | 12.4 *                                        | 2.1                                                |
| BofuT4_P135380.1                       | SS1G_12191.1                      | GH10                        | H                                  | 13.9 *                                        | 2.0                                                |

| CAZy genes overexpressed mainly in one fungus |                                   |                             |                                    |                                               |                                                    |
|-----------------------------------------------|-----------------------------------|-----------------------------|------------------------------------|-----------------------------------------------|----------------------------------------------------|
| Gene ID<br><i>B.cinerea</i>                   | Gene ID<br><i>S. sclerotiorum</i> | CAZy<br>family <sup>a</sup> | Substrate<br>category <sup>b</sup> | Fold change<br>infection<br><i>B. cinerea</i> | Fold change<br>infection<br><i>S. sclerotiorum</i> |
| BofuT4_P031660.1                              | SS1G_09251.1                      | GH61                        | C                                  | <b>74.1</b> *                                 | 1.9                                                |
| BofuT4_P109330.1                              | SS1G_01838.1                      | GH61                        | C                                  | <b>44.0</b> *                                 | 1.1                                                |
| BofuT4_P004830.1                              | SS1G_07847.1                      | GH3                         | C or H <sup>†</sup>                | <b>39.5</b> *                                 | 1.5                                                |
| BofuT4_P015800.1                              | SS1G_00040.1                      | PL1                         | P                                  | <b>30.4</b> *                                 | 1.0                                                |
| BofuT4_P128360.1                              | SS1G_12622.1                      | GH1                         | C or FCW <sup>†</sup>              | <b>19.0</b> *                                 | 1.7                                                |
| BofuT4_P043000.1                              | SS1G_05832.1                      | GH28                        | P                                  | <b>9.9</b> *                                  | -1.7                                               |
| BofuT4_P103260.1                              | SS1G_12057.1                      | GH28                        | P                                  | <b>7.3</b> *                                  | 1.5                                                |
| BofuT4_P152970.1                              | SS1G_11057.1                      | GH28                        | P                                  | <b>6.5</b> *                                  | -1.2                                               |
| BofuT4_P019100.1                              | SS1G_00321.1                      | GH81                        | FCW                                | <b>6.2</b> *                                  | 1.6                                                |
| BofuT4_P122770.1                              | SS1G_01373.1                      | CBM1                        | PCW <sup>†</sup>                   | <b>4.3</b> *                                  | -1.2                                               |
| BofuT4_P132940.1                              | SS1G_08229.1                      | GH28                        | P                                  | 1.5                                           | <b>24.4</b> *                                      |
| BofuT4_P030090.1                              | SS1G_02618.1                      | GH43                        | HP                                 | 1.6                                           | <b>9.2</b> *                                       |
| BofuT4_P118760.1                              | SS1G_09857.1                      | GH105                       | P                                  | -1.5                                          | <b>6.7</b> *                                       |
| BofuT4_P150610.1                              | SS1G_09129.1                      | GH1                         |                                    | 1.7                                           | <b>3.2</b> *                                       |
| BofuT4_P113750.1                              | SS1G_05557.1                      | GT32                        |                                    | 1.4                                           | <b>2.6</b> *                                       |
| BofuT4_P089070.1                              | SS1G_01005.1                      | GH31                        | E or FCW <sup>†</sup>              | 1.3                                           | <b>2.2</b> *                                       |

| CAZy genes underexpressed mainly in one fungus |                                   |                             |                                    |                                               |                                                    |
|------------------------------------------------|-----------------------------------|-----------------------------|------------------------------------|-----------------------------------------------|----------------------------------------------------|
| Gene ID<br><i>B.cinerea</i>                    | Gene ID<br><i>S. sclerotiorum</i> | CAZy<br>family <sup>a</sup> | Substrate<br>category <sup>b</sup> | Fold change<br>infection<br><i>B. cinerea</i> | Fold change<br>infection<br><i>S. sclerotiorum</i> |
| BofuT4_P008230.1                               | SS1G_10847.1                      | GT2                         | FCW <sup>†</sup>                   | <b>-39.5</b> *                                | -1.3                                               |
| BofuT4_P060820.1                               | SS1G_14460.1                      | GH72                        | FCW                                | <b>-16.7</b> *                                | -1.6                                               |
| BofuT4_P116560.1                               | SS1G_01882.1                      | CE5                         | H                                  | <b>-7.3</b> *                                 | -1.2                                               |
| BofuT4_P008250.1                               | SS1G_10845.1                      | GH12                        | C                                  | <b>-4.5</b> *                                 | -1.1                                               |
| BofuT4_P116630.1                               | SS1G_01889.1                      | GT2                         | FCW <sup>†</sup>                   | <b>-2.3</b> *                                 | 1.5                                                |
| BofuT4_P063490.1                               | SS1G_05784.1                      | GH71                        | FCW                                | -1.44                                         | <b>-4.8</b> *                                      |
| BofuT4_P034570.1                               | SS1G_08695.1                      | GH18                        | FCW                                | 1.60                                          | <b>-4.4</b> *                                      |
| BofuT4_P008430.1                               | SS1G_10867.1                      | GH76                        | FCW                                | 1.54                                          | <b>-4.2</b> *                                      |
| BofuT4_P046700.1                               | SS1G_04062.1                      | GT4                         |                                    | -1.14                                         | <b>-4.0</b> *                                      |
| BofuT4_P116860.1                               | SS1G_01334.1                      | GH92                        |                                    | -1.19                                         | <b>-3.1</b> *                                      |
| BofuT4_P062560.1                               | SS1G_13392.1                      | CBM32                       |                                    | -1.08                                         | <b>-2.9</b> *                                      |
| BofuT4_P122270.1                               | SS1G_01422.1                      | GH16                        | FCW or H <sup>†</sup>              | -1.83                                         | <b>-2.5</b> *                                      |
| BofuT4_P030230.1                               | SS1G_02625.1                      | GT17                        |                                    | 1.5                                           | <b>-2.0</b> *                                      |

| CAZy genes differentially expressed and present in only one fungus |                                   |                          |                                    |                                               |                                                    |
|--------------------------------------------------------------------|-----------------------------------|--------------------------|------------------------------------|-----------------------------------------------|----------------------------------------------------|
| Gene ID<br><i>B.cinerea</i>                                        | Gene ID<br><i>S. sclerotiorum</i> | CAZy family <sup>a</sup> | Substrate<br>category <sup>b</sup> | Fold change<br>infection<br><i>B. cinerea</i> | Fold change<br>infection<br><i>S. sclerotiorum</i> |
| BofuT4_P061870.1                                                   |                                   | GH28                     | P                                  | <b>11.59</b> *                                |                                                    |
| BofuT4_P059350.1                                                   |                                   | PL1                      | P                                  | <b>6.22</b> *                                 |                                                    |
| BofuT4_P041780.1                                                   |                                   | GT8                      |                                    | <b>-18.25</b> *                               |                                                    |
|                                                                    | SS1G_07331.1                      | GH30                     | E                                  |                                               | <b>-2.2</b> *                                      |
|                                                                    | SS1G_02128.1                      | GH18 + CBM18             | FCW                                |                                               | <b>-2.1</b> *                                      |

**Red** - Positive fold changes upon infection ; **Green** - Negative fold changes upon infection

\* The differential expression is statistically significant.

<sup>a</sup> CAZy family annotations: GH - Glycoside Hydrolase; CE - Carbohydrate Esterase; CBM - Carbohydrate-Binding Module; GT – Glycosyltransferase; PL - Polysaccharide Lyase.

<sup>b</sup> CAZy substrate category: C - cellulose; H - hemicellulose; P - pectin; HP - hemicellulose/pectin side chains; E - energy; FCW-fungal cell wall.

<sup>†</sup> For models from families with a wide substrate preference, a substrate prediction was made by comparison against the sequences of previously characterized proteins in CAZy.
